# Supplementary material for: A Safe and Effective Two-Step Tract Dilation Technique in Totally Ultrasound-Guided Percutaneous Nephrolithotomy
Source: Research Square preprint supplement (doi:10.21203/rs.3.rs-899484/v1), 2021-09-22
Supplement: Supplementary file 1 [file f9c06bb1c27c755943f57b0f.pdf]

**Table 2. Outcomes of Totally Ultrasound-Guided PCNL**

|                                    |             |
|------------------------------------|-------------|
| Success tract establishment, n (%) | 18 (94.7%)  |
| Tract establishment time, mins     | 10.4 [4.9]  |
| Operation time, mins               | 67.0 [52.2] |
| Stone-free status, n (%)           | 15 (78.9%)  |
| Total hospital stay, days          | 3.9 [4.0]   |
| Postoperative stay, days           | 2.7 [3.9]   |
| Hb drop (mg/dl)                    | 1.0 [1.1]   |
| Postoperative pyuria, n (%)        | 8 (42.1%)   |
| Postoperative fever, n (%)         | 3 (15.8%)   |
| Pleural injury, n (%)              | 2 (10.5%)   |
| Ancillary procedure, n (%)         | 3 (15.8%)   |
